# Supplementary material
Source: HighWire-hosted journal article supplement (https://erj.ersjournals.com/content/59/1/2102064)
Supplement: inline-supplementary-material-1 [file inline-supplementary-material-1.pdf]

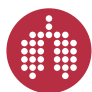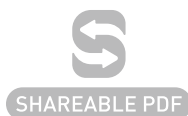

# The assessment of pulmonary arterial pressure and its clinical relevance: a 100-year journey from Europe, over the United States to Australia

Gabor Kovacs<sup>1,2</sup> and Bradley A. Maron<sup>3</sup>

<sup>1</sup>Ludwig Boltzmann Institute for Lung Vascular Research, Graz, Austria. <sup>2</sup>Division of Pulmonology, Dept of Internal Medicine, Medical University of Graz, Graz, Austria. <sup>3</sup>Brigham and Women's Hospital and Harvard Medical School, Boston, MA, USA.

Corresponding author: Gabor Kovacs ([gabor.kovacs@klinikum-graz.at](mailto:gabor.kovacs@klinikum-graz.at))

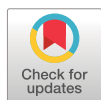

Shareable abstract (@ERSpublications)

**The elevation of pulmonary arterial pressure is a clinically important, robust, prognostic relevant haemodynamic marker in several diseases and conditions** <https://bit.ly/3lrN9rF>

**Cite this article as:** Kovacs G, Maron BA. The assessment of pulmonary arterial pressure and its clinical relevance: a 100-year journey from Europe, over the United States to Australia. *Eur Respir J* 2022; 59: 2102064 [DOI: 10.1183/13993003.02064-2021].

This single-page version can be shared freely online.

Copyright ©The authors 2022.  
For reproduction rights and  
permissions contact  
[permissions@ersnet.org](mailto:permissions@ersnet.org)

Received: 24 July 2021  
Accepted: 28 July 2021

When Werner Forssmann performed the first right heart catheterisation on himself in the 1920s in Germany, his main goal was to inject drugs directly into the right ventricle [1] without injuring the wall of the heart or the coronary vessels. He may not have immediately realised that his method would form the basis for measuring the pressure in the pulmonary arteries and diagnosing pulmonary hypertension (PH). Some years later, it was André Cournand and Dickinson Woodruff Richards in the USA who performed pioneering physiological investigations on the pulmonary circulation by using right heart catheterisation [2], for which these three scientists together received the Nobel Prize for physiology or medicine in 1956.
